# Supplementary material
Source: Springer Nature journal article supplement (https://www.springermedizin.de/resource/supplementary/12883_2013_1035_MOESM1_ESM.pdf/9456412)
Supplement: MOESM1 [file 9456412]

# CEREBRAL ISCHEMIC LESION

GOT

CRP

GPT

WBC

Haemoglobin

RBC

gGT

Platelets

Unconjugated  
Bilirubin

⊖

⊖

⊖
